# Supplementary material for: Clothing polymer fibers with well-aligned and high-aspect ratio carbon nanotubes
Source: Royal Society of Chemistry journal article supplement (doi:10.1039/c3nr34208e), 2013-01-01
Supplement: c3nr34208e.pdf [file c3nr34208e.pdf]

*Supplementary Information*

## **Clothing polymer fibers with well-aligned and high-aspect ratio carbon nanotubes**

**Gengzhi Sun, Lianxi Zheng,\* Jia An, Yongzheng Pan, Jinyuan Zhou, Zhaoyao Zhan,  
John H. L. Pang, Chee Kai Chua, Kah Fai Leong, Lin Li**

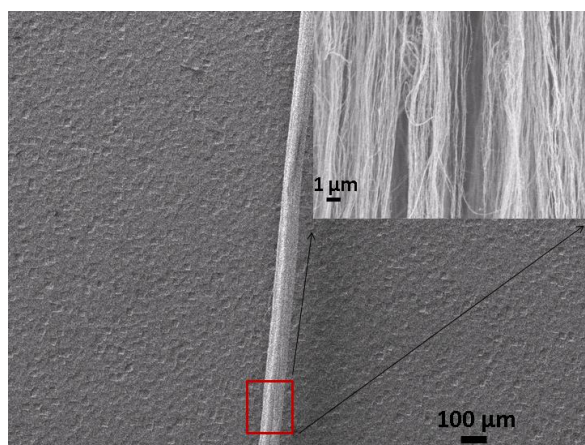

Figure S1. SEM images of a composite fiber before DMF treatment. (The inset is a magnified SEM image of CNTs on the surface of composite fiber).

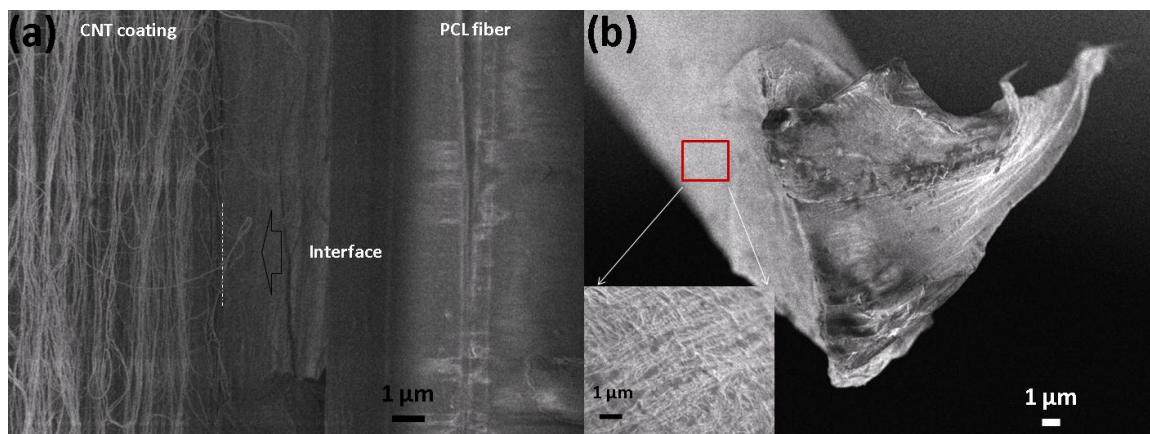

Figure S2. SEM images of the interface between CNTs and PCL fibers before (a) and after (b) DMF treatment.
